# Supplementary material for: Large and anisotropic carrier mobility in monolayers of the MA2Z4 series (M = Cr, Mo, W; A = Si, Ge; and Z = N, P)
Source: Royal Society of Chemistry journal article supplement (doi:10.1039/d2nr02382b), 2022-01-01
Supplement: d2nr02382b1.pdf [file d2nr02382b1.pdf]

**Supporting Information for**  
**Large and anisotropic carrier mobility in monolayers of the MA<sub>2</sub>Z<sub>4</sub> series**  
**(M=Cr, Mo, W; A=Si, Ge; Z=N, P)**

Achintya Priyadarshi,<sup>1,\*</sup> Yogesh Singh Chauhan,<sup>1,†</sup> Somnath Bhowmick,<sup>2,‡</sup> and Amit Agarwal<sup>3,§</sup>

<sup>1</sup>*Department of Electrical Engineering, Indian Institute of Technology Kanpur, Kanpur 208016, India*

<sup>2</sup>*Department of Materials Science and Engineering,  
Indian Institute of Technology Kanpur, Kanpur 208016, India*

<sup>3</sup>*Department of Physics, Indian Institute of Technology Kanpur, Kanpur 208016, India*

(Dated: July 14, 2022)

---

\* [achintya@iitk.ac.in](mailto:achintya@iitk.ac.in)

† [chauhan@iitk.ac.in](mailto:chauhan@iitk.ac.in)

‡ [bsomnath@iitk.ac.in](mailto:bsomnath@iitk.ac.in)

§ [amitag@iitk.ac.in](mailto:amitag@iitk.ac.in)

## I. LIST OF TABLES

**TABLE S1:** Structural parameters and DFT-PBE calculated electronic band gap of relaxed  $MA_2Z_4$  monolayers.

| Material                         | a    | b    | d <sub>1</sub> | d <sub>2</sub> | d <sub>3,4</sub> | $\theta_{1,2}$ | $\theta_{3,4}$ | E <sub>g</sub> |
|----------------------------------|------|------|----------------|----------------|------------------|----------------|----------------|----------------|
|                                  | (Å)  | (Å)  | (Å)            | (Å)            | (Å)              | (°)            | (°)            | (eV)           |
| MoSi <sub>2</sub> N <sub>4</sub> | 2.90 | 5.03 | 2.90           | 2.09           | 1.75, 1.74       | 73.6,87.8      | 112.0,106.8    | 1.86           |
| MoGe <sub>2</sub> N <sub>4</sub> | 3.02 | 5.23 | 3.02           | 2.12           | 1.85,1.86        | 69.7,90.6      | 109.4,109.5    | 1.00           |
| MoSi <sub>2</sub> P <sub>4</sub> | 3.45 | 5.98 | 3.45           | 2.45           | 2.24,2.21        | 71.0,89.6      | 100.9,117.1    | 0.70           |
| MoGe <sub>2</sub> P <sub>4</sub> | 3.52 | 6.09 | 3.52           | 2.46           | 2.31,2.30        | 68.9,91.2      | 99.3,118.4     | 0.58           |
| WSi <sub>2</sub> N <sub>4</sub>  | 2.89 | 5.01 | 2.89           | 2.09           | 1.74,1.75        | 73.8,87.7      | 111.9,106.9    | 2.17           |
| WGe <sub>2</sub> N <sub>4</sub>  | 3.00 | 5.20 | 3.00           | 2.12           | 1.85,1.86        | 69.7,90.6      | 109.4,109.5    | 1.30           |
| WSi <sub>2</sub> P <sub>4</sub>  | 3.47 | 6.01 | 3.47           | 2.45           | 2.24,2.21        | 70.0,90.3      | 101.3,116.8    | 0.48           |
| WGe <sub>2</sub> P <sub>4</sub>  | 3.53 | 6.11 | 3.53           | 2.46           | 2.31,2.29        | 67.9,91.8      | 99.6,118.1     | 0.44           |
| CrSi <sub>2</sub> N <sub>4</sub> | 2.85 | 4.94 | 2.85           | 2.02           | 1.73,1.74        | 71.1,89.6      | 111.0,107.9    | 0.62           |
| CrGe <sub>2</sub> N <sub>4</sub> | 2.95 | 5.11 | 2.95           | 2.04           | 1.83,1.87        | 66.5,92.9      | 107.7,111.2    | NA             |
| CrSi <sub>2</sub> P <sub>4</sub> | 3.41 | 5.91 | 3.41           | 2.37           | 2.22,2.22        | 67.6,92.0      | 99.9,117.8     | 0.30           |
| CrGe <sub>2</sub> P <sub>4</sub> | 3.47 | 6.01 | 3.47           | 2.38           | 2.30,2.31        | 64.9,93.9      | 98.3,119.1     | NA             |

**TABLE S2:** A comparison of the effective mass at VBM and CBM and charge carrier mobility in materials in which the impact of SOC is not negligible. The values outside and inside the parentheses represent the quantity without and with SOC, respectively.

| Material                        | Carrier type    | $m_x^*/m_0$  | $m_y^*/m_0$  | $\mu$                                               |                                                     |
|---------------------------------|-----------------|--------------|--------------|-----------------------------------------------------|-----------------------------------------------------|
|                                 |                 |              |              | $\mu_x$                                             | $\mu_y$                                             |
|                                 |                 |              |              | $(10^3 \text{ cm}^2 \text{ V}^{-1} \text{ s}^{-1})$ | $(10^3 \text{ cm}^2 \text{ V}^{-1} \text{ s}^{-1})$ |
| WSi <sub>2</sub> P <sub>4</sub> | e <sub>X'</sub> | 0.175(0.129) | 0.178(0.130) | 5.18(9.57)                                          | 6.42(12.01)                                         |
|                                 | h <sub>X'</sub> | 0.218(0.155) | 0.225(0.155) | 10.01(20.17)                                        | 7.01(14.60)                                         |
| WGe <sub>2</sub> P <sub>4</sub> | e <sub>X'</sub> | 0.194(0.134) | 0.199(0.133) | 5.30(11.32)                                         | 6.97(15.38)                                         |
|                                 | h <sub>X'</sub> | 0.211(0.152) | 0.301(0.223) | 8.78(16.70)                                         | 5.33(9.86)                                          |

**TABLE S3:** The acoustic phonon limited carrier mobility for the  $MA_2Z_4$  monolayers. Values inside and outside the parentheses correspond to the mobility calculated using equations S1 and S2, respectively.

| Material                         | Carrier type    | $\mu_x$                                          | $\mu_y$                                          |
|----------------------------------|-----------------|--------------------------------------------------|--------------------------------------------------|
|                                  |                 | $(10^3 \text{cm}^2 \text{V}^{-1} \text{s}^{-1})$ | $(10^3 \text{cm}^2 \text{V}^{-1} \text{s}^{-1})$ |
| MoSi <sub>2</sub> N <sub>4</sub> | e <sub>X'</sub> | 0.28(0.28)                                       | 0.27(0.28)                                       |
|                                  | h <sub>Γ</sub>  | 0.39(0.37)                                       | 0.32(0.34)                                       |
|                                  | h <sub>X'</sub> | 2.29(1.99)                                       | 1.57(1.77)                                       |
| MoGe <sub>2</sub> N <sub>4</sub> | e <sub>X'</sub> | 6.09(6.59)                                       | 7.68(7.00)                                       |
|                                  | h <sub>Γ</sub>  | 1.52(1.55)                                       | 1.72(1.61)                                       |
|                                  | h <sub>X'</sub> | 8.43(7.53)                                       | 6.05(6.71)                                       |
| MoSi <sub>2</sub> P <sub>4</sub> | e <sub>X'</sub> | 1.37(1.98)                                       | 1.57(1.81)                                       |
|                                  | h <sub>Γ</sub>  | 0.47(0.45)                                       | 0.41(0.43)                                       |
|                                  | h <sub>X'</sub> | 5.01(4.51)                                       | 3.53(3.90)                                       |
| MoGe <sub>2</sub> P <sub>4</sub> | e <sub>X'</sub> | 1.62(1.98)                                       | 2.92(2.29)                                       |
|                                  | h <sub>Γ</sub>  | 0.33(0.28)                                       | 0.09(0.11)                                       |
|                                  | h <sub>X'</sub> | 6.42(5.86)                                       | 4.23(4.61)                                       |
| WSi <sub>2</sub> N <sub>4</sub>  | e <sub>Γ</sub>  | 2.97(2.64)                                       | 1.36(1.51)                                       |
|                                  | e <sub>X'</sub> | 2.52(2.77)                                       | 3.23(2.94)                                       |
|                                  | e <sub>S</sub>  | 0.68(0.68)                                       | 0.64(0.63)                                       |
|                                  | h <sub>Γ</sub>  | 0.37(0.38)                                       | 0.38(0.38)                                       |
|                                  | h <sub>X'</sub> | 1.41(1.34)                                       | 1.17(1.22)                                       |
| WGe <sub>2</sub> N <sub>4</sub>  | e <sub>X'</sub> | 12.41(10.57)                                     | 7.33(8.48)                                       |
|                                  | h <sub>Γ</sub>  | 1.34(1.30)                                       | 1.24(1.28)                                       |
|                                  | h <sub>X'</sub> | 2.42(2.40)                                       | 2.09(2.13)                                       |
| WSi <sub>2</sub> P <sub>4</sub>  | e <sub>X'</sub> | 5.18(5.63)                                       | 6.42(5.87)                                       |
|                                  | h <sub>Γ</sub>  | 0.28(0.23)                                       | 0.20(0.24)                                       |
|                                  | h <sub>X'</sub> | 10.01(8.82)                                      | 7.01(7.89)                                       |
| WGe <sub>2</sub> P <sub>4</sub>  | e <sub>X'</sub> | 5.30(5.90)                                       | 6.97(6.20)                                       |
|                                  | h <sub>Γ</sub>  | 0.35(0.36)                                       | 0.24(0.23)                                       |
|                                  | h <sub>X'</sub> | 8.78(8.32)                                       | 5.33(5.63)                                       |
| CrSi <sub>2</sub> N <sub>4</sub> | e <sub>X'</sub> | 6.05(6.99)                                       | 8.99(7.60)                                       |
|                                  | h <sub>Γ</sub>  | 0.39(0.36)                                       | 0.40(0.35)                                       |
|                                  | h <sub>X'</sub> | 4.32(4.16)                                       | 3.64(3.80)                                       |
| CrSi <sub>2</sub> P <sub>4</sub> | e <sub>X'</sub> | 1.06(1.04)                                       | 0.96(0.98)                                       |
|                                  | h <sub>Γ</sub>  | 0.40(0.47)                                       | 1.37(1.14)                                       |
|                                  | h <sub>X'</sub> | 1.43(1.63)                                       | 2.01(1.72)                                       |

**TABLE S4:** A comparison of band gap (eV) and charge carrier mobility (Unit:  $10^3 \text{ cm}^2\text{V}^{-1}\text{s}^{-1}$ ) in various 2D materials.

| Material                                            | $E_g$ | $\mu_x^e$ | $\mu_y^e$ | $\mu_x^h$ | $\mu_y^h$ | ref |
|-----------------------------------------------------|-------|-----------|-----------|-----------|-----------|-----|
| ZrS <sub>2</sub>                                    | 1.16  | 0.97      | 0.020     | 0.072     | 0.262     | [1] |
| ZrSe <sub>2</sub>                                   | 0.38  | 3.92      | 0.022     | 0.12      | 0.59      | [1] |
| ZrSSe                                               | 0.66  | 1.36      | 0.018     | 0.10      | 0.45      | [1] |
| ZrSeTe                                              | -0.04 | 1.15      | 0.005     | 1.21      | 2.23      | [1] |
| ZrSTe                                               | -0.12 | 0.91      | 0.001     | 2.80      | 1.46      | [1] |
| HfS <sub>2</sub>                                    | 1.33  | 2.55      | 0.003     | 0.067     | 0.49      | [1] |
| HfSe <sub>2</sub>                                   | 0.48  | 0.60      | 0.035     | 0.24      | 0.33      | [1] |
| HfSSe <sub>2</sub>                                  | 0.74  | 3.82      | 0.025     | 0.17      | 0.15      | [1] |
| HfSeTe                                              | -0.03 | 3.31      | 0.007     | 0.56      | 0.26      | [1] |
| HfSTe                                               | -0.23 | 1.86      | 0.002     | 0.62      | 0.57      | [1] |
| Nb <sub>2</sub> Se <sub>9</sub>                     | 0.83  | 1.91      | 0.03      | 0.029     | 0.027     | [2] |
| SnSe                                                | 0.5   | 1.17      | 2.10      | 0.69      | 0.72      | [3] |
| PC <sub>6</sub>                                     | 0.84  | 294       | 3.2       | 24.80     | 164       | [4] |
| Nb <sub>3</sub> SBr <sub>7</sub>                    | 0.72  | NA        | NA        | NA        | NA        | [5] |
| Ta <sub>3</sub> SBr <sub>7</sub>                    | 0.75  | NA        | NA        | NA        | NA        | [5] |
| MoSi <sub>2</sub> N <sub>4</sub> /CrCl <sub>3</sub> | 1.85  | NA        | NA        | NA        | NA        | [6] |
| MoSe <sub>2</sub> /MoSi <sub>2</sub> N <sub>4</sub> | 1.38  | 1.84      | 1.85      | 22.35     | 22.69     | [7] |

**TABLE S5:** Strain-dependent effective mass and carrier mobility in MoGe<sub>2</sub>P<sub>4</sub>, WSi<sub>2</sub>N<sub>4</sub> and WGe<sub>2</sub>P<sub>4</sub> monolayer. Note that the carrier's mobility changes in response to uniaxial strain only when VBM or CBM is shifting.

| Material                         | Strain (%)<br>(CBM/VBM location) |                 | Carrier type    | $m_x^*/m_0$ | $m_y^*/m_0$ | $E_x$<br>(eV) | $E_y$<br>(eV) | $C_x$<br>(J/m <sup>2</sup> ) | $C_y$<br>(J/m <sup>2</sup> ) | $\mu_x$<br>(10 <sup>3</sup> cm <sup>2</sup> V <sup>-1</sup> s <sup>-1</sup> ) | $\mu_y$<br>(10 <sup>3</sup> cm <sup>2</sup> V <sup>-1</sup> s <sup>-1</sup> ) |
|----------------------------------|----------------------------------|-----------------|-----------------|-------------|-------------|---------------|---------------|------------------------------|------------------------------|-------------------------------------------------------------------------------|-------------------------------------------------------------------------------|
| MoGe <sub>2</sub> P <sub>4</sub> | $\sigma_x$                       | -3              | e <sub>x'</sub> | No change   |             |               |               |                              |                              |                                                                               |                                                                               |
|                                  |                                  |                 | h <sub>x'</sub> | No change   |             |               |               |                              |                              |                                                                               |                                                                               |
|                                  |                                  | 3               | e <sub>x'</sub> | No change   |             |               |               |                              |                              |                                                                               |                                                                               |
|                                  |                                  |                 | h <sub>x'</sub> | 1.262       | 2.616       | 1.97          | 2.50          | 207.18                       | 211.67                       | 0.32                                                                          | 0.09                                                                          |
|                                  | $\sigma_y$                       | -3              | e <sub>x'</sub> | No change   |             |               |               |                              |                              |                                                                               |                                                                               |
|                                  |                                  |                 | h <sub>x'</sub> | No change   |             |               |               |                              |                              |                                                                               |                                                                               |
| 3                                |                                  | e <sub>x'</sub> | No change       |             |             |               |               |                              |                              |                                                                               |                                                                               |
|                                  |                                  | h <sub>x'</sub> | 1.294           | 2.615       | 1.97        | 2.50          | 207.18        | 211.67                       | 0.31                         | 0.098                                                                         |                                                                               |
| WSi <sub>2</sub> N <sub>4</sub>  | $\sigma_x$                       | -3              | e <sub>s</sub>  | 0.624       | 0.556       | 5.33          | 5.88          | 521.26                       | 521.70                       | 0.69                                                                          | 0.64                                                                          |
|                                  |                                  |                 | h <sub>r</sub>  | No change   |             |               |               |                              |                              |                                                                               |                                                                               |
|                                  |                                  | 3               | e <sub>r</sub>  | 0.311       | 0.520       | 4.32          | 5.01          | 521.26                       | 521.70                       | 2.90                                                                          | 1.12                                                                          |
|                                  |                                  |                 | h <sub>r</sub>  | No change   |             |               |               |                              |                              |                                                                               |                                                                               |
|                                  | $\sigma_y$                       | -3              | e <sub>r</sub>  | 0.320       | 0.520       | 4.32          | 5.01          | 521.26                       | 521.70                       | 2.98                                                                          | 1.37                                                                          |
|                                  |                                  |                 | h <sub>r</sub>  | No change   |             |               |               |                              |                              |                                                                               |                                                                               |
| 3                                |                                  | e <sub>x'</sub> | No change       |             |             |               |               |                              |                              |                                                                               |                                                                               |
|                                  |                                  | h <sub>r</sub>  | No change       |             |             |               |               |                              |                              |                                                                               |                                                                               |
| WGe <sub>2</sub> P <sub>4</sub>  | $\sigma_x$                       | -3              | e <sub>x'</sub> | No change   |             |               |               |                              |                              |                                                                               |                                                                               |
|                                  |                                  |                 | h <sub>x'</sub> | No change   |             |               |               |                              |                              |                                                                               |                                                                               |
|                                  |                                  | 3               | e <sub>x'</sub> | No change   |             |               |               |                              |                              |                                                                               |                                                                               |
|                                  |                                  |                 | h <sub>x'</sub> | 1.283       | 2.101       | 2.05          | 1.96          | 219.50                       | 219.51                       | 0.35                                                                          | 0.23                                                                          |
|                                  | $\sigma_y$                       | -3              | e <sub>x'</sub> | No change   |             |               |               |                              |                              |                                                                               |                                                                               |
|                                  |                                  |                 | h <sub>x'</sub> | No change   |             |               |               |                              |                              |                                                                               |                                                                               |
| 3                                |                                  | e <sub>x'</sub> | No change       |             |             |               |               |                              |                              |                                                                               |                                                                               |
|                                  |                                  | h <sub>x'</sub> | 1.281           | 2.109       | 2.05        | 1.96          | 219.50        | 219.51                       | 0.35                         | 0.23                                                                          |                                                                               |

## II. LIST OF FIGURES

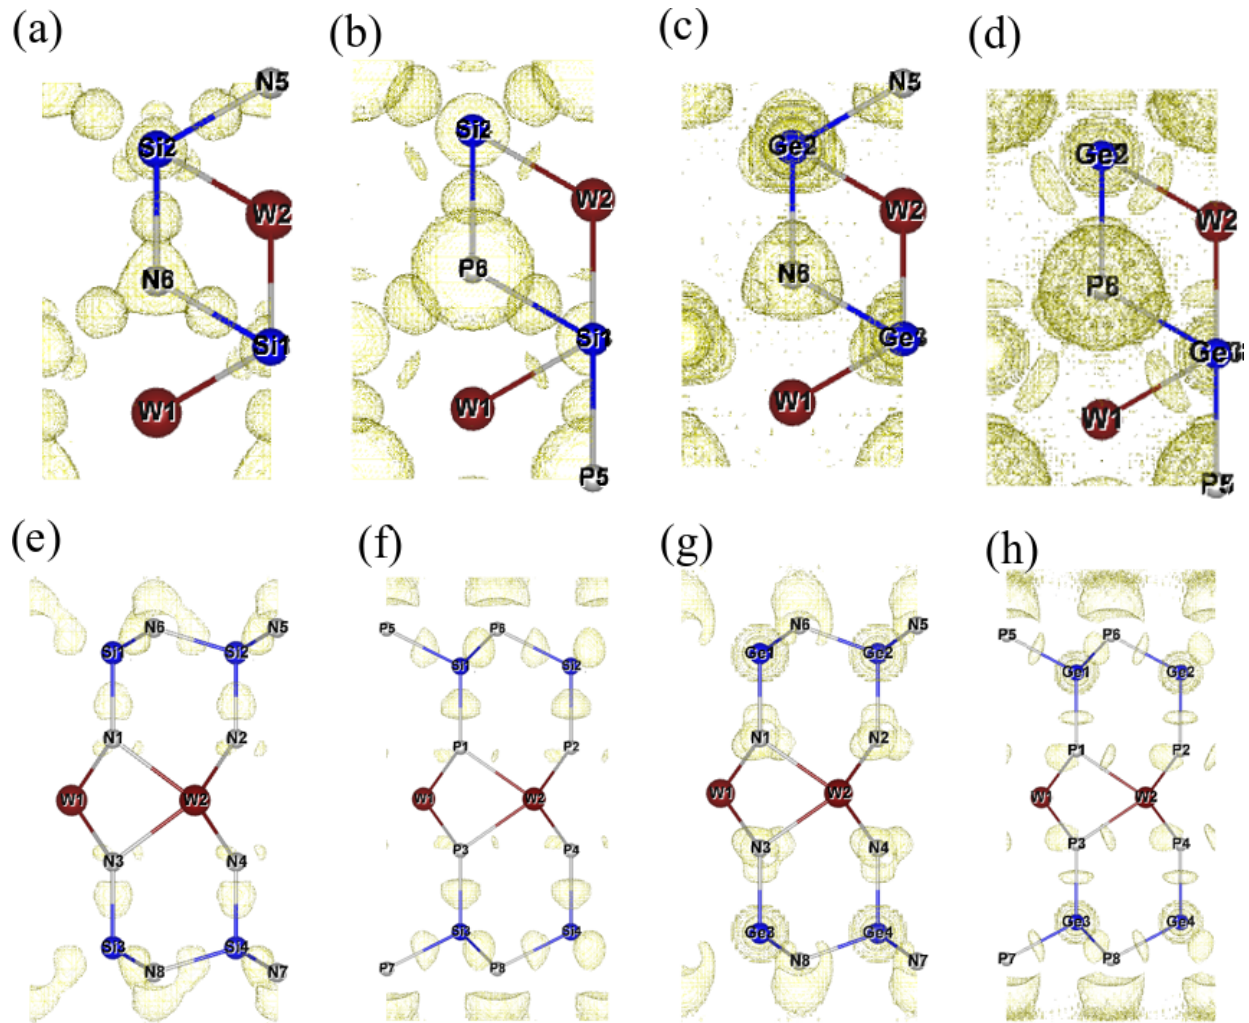

**FIG. S1:** (a)-(d) The top view and (e)-(f) The side of electron localization function (ELF) in  $\text{WSi}_2\text{N}_4$ ,  $\text{WSi}_2\text{P}_4$ ,  $\text{WGe}_2\text{N}_4$  and  $\text{WGe}_2\text{P}_4$  monolayers. The isosurface value is set to be  $0.85 \text{ e} \text{ \AA}^{-3}$ .

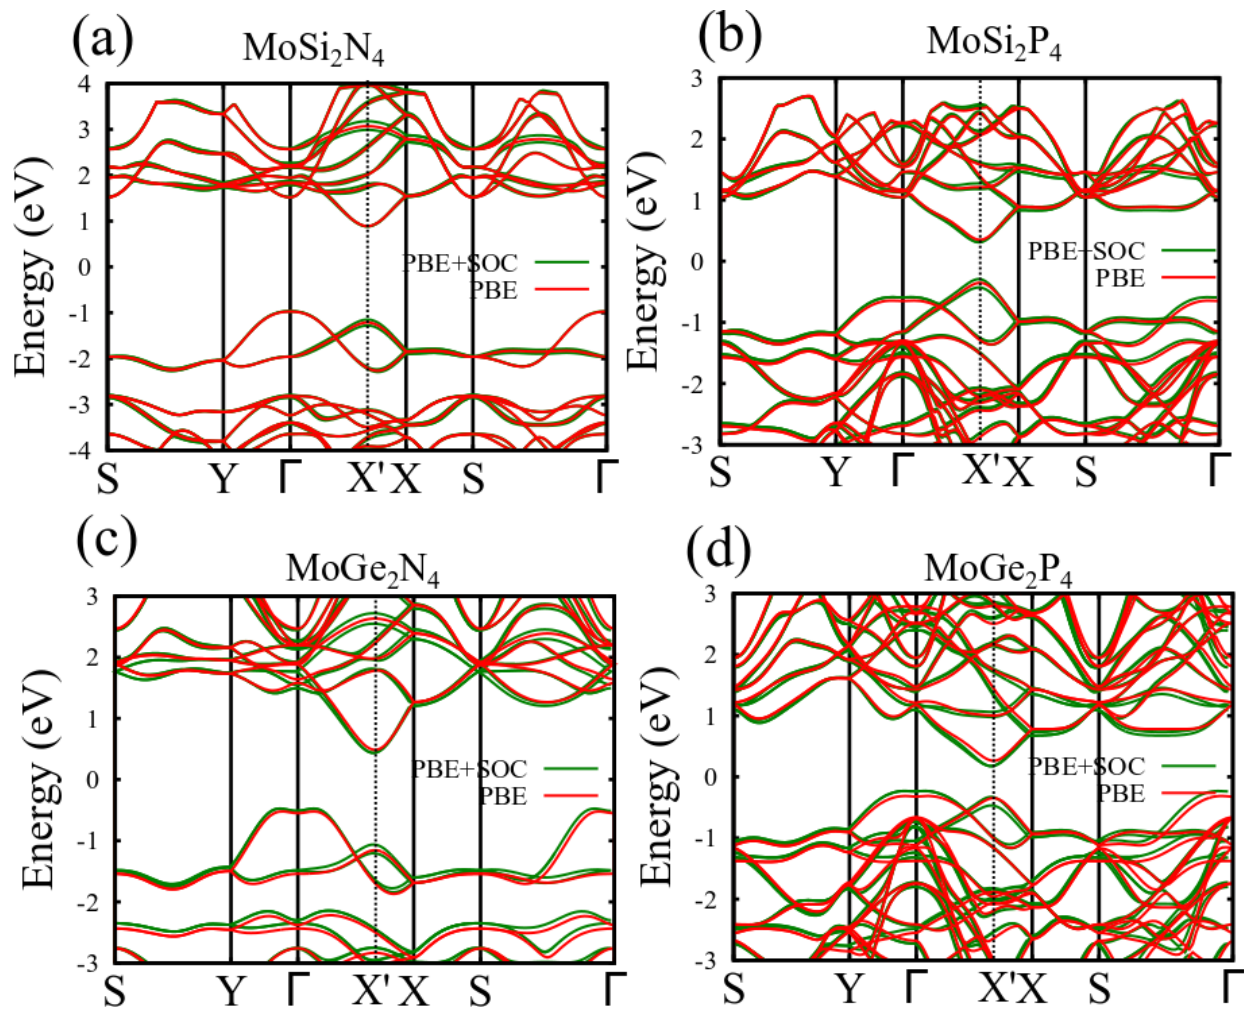

**FIG. S2:** PBE and PBE+SOC bandstructure of MoA<sub>2</sub>Z<sub>4</sub> monolayers. The red and green lines represent PBE and PBE+SOC results, respectively.



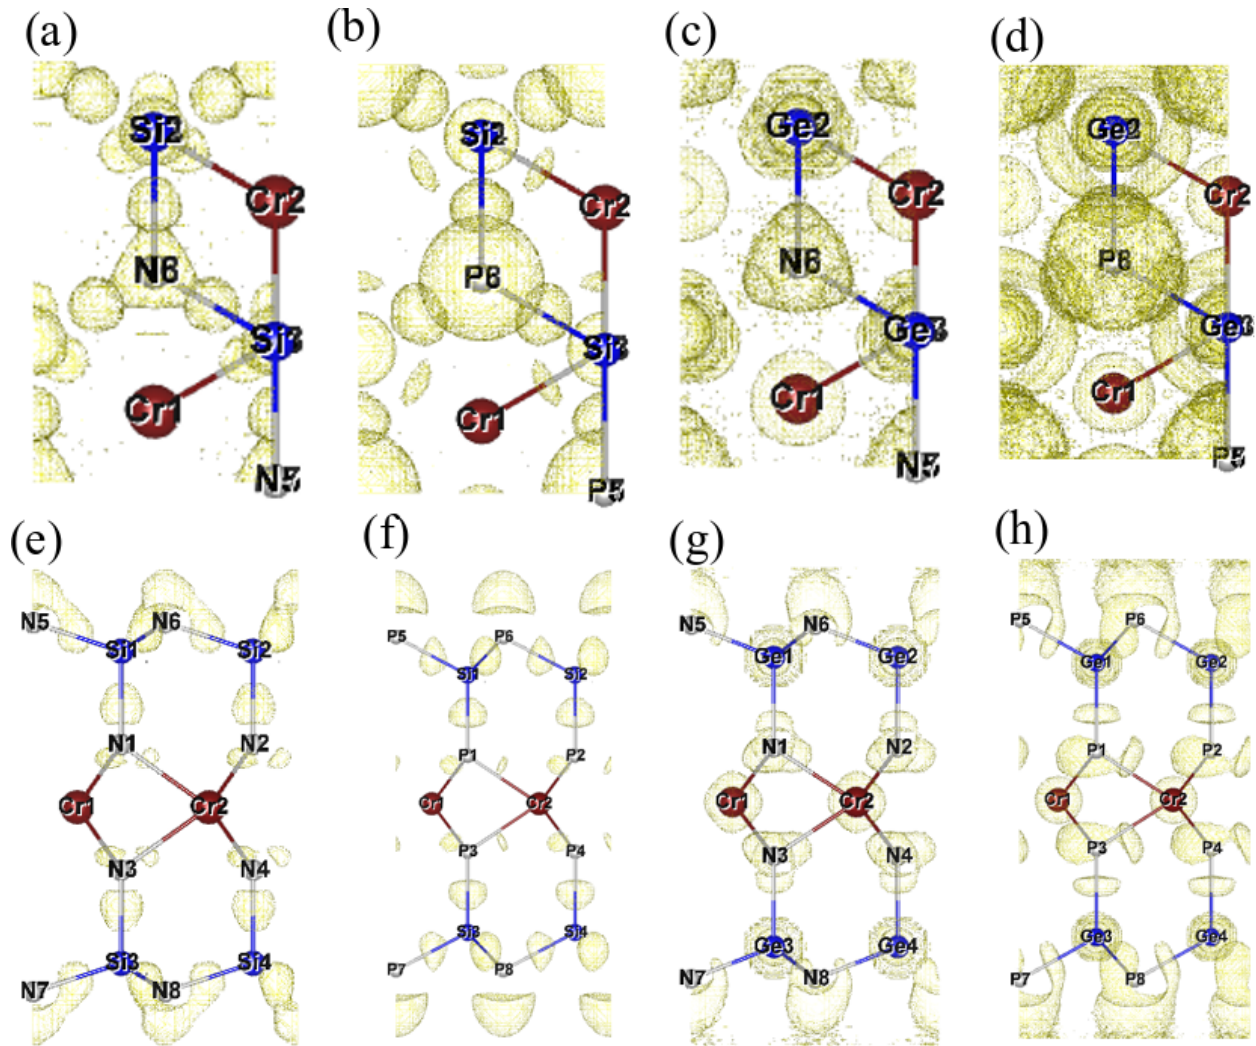

**FIG. S3:** (a)-(d) The top view and (e)-(f) The side of electron localization function (ELF) in CrSi<sub>2</sub>N<sub>4</sub>, CrSi<sub>2</sub>P<sub>4</sub>, CrGe<sub>2</sub>N<sub>4</sub> and CrGe<sub>2</sub>P<sub>4</sub> monolayers. The isosurface value is set to be 0.85 e<sup>-3</sup> Å<sup>-3</sup>.

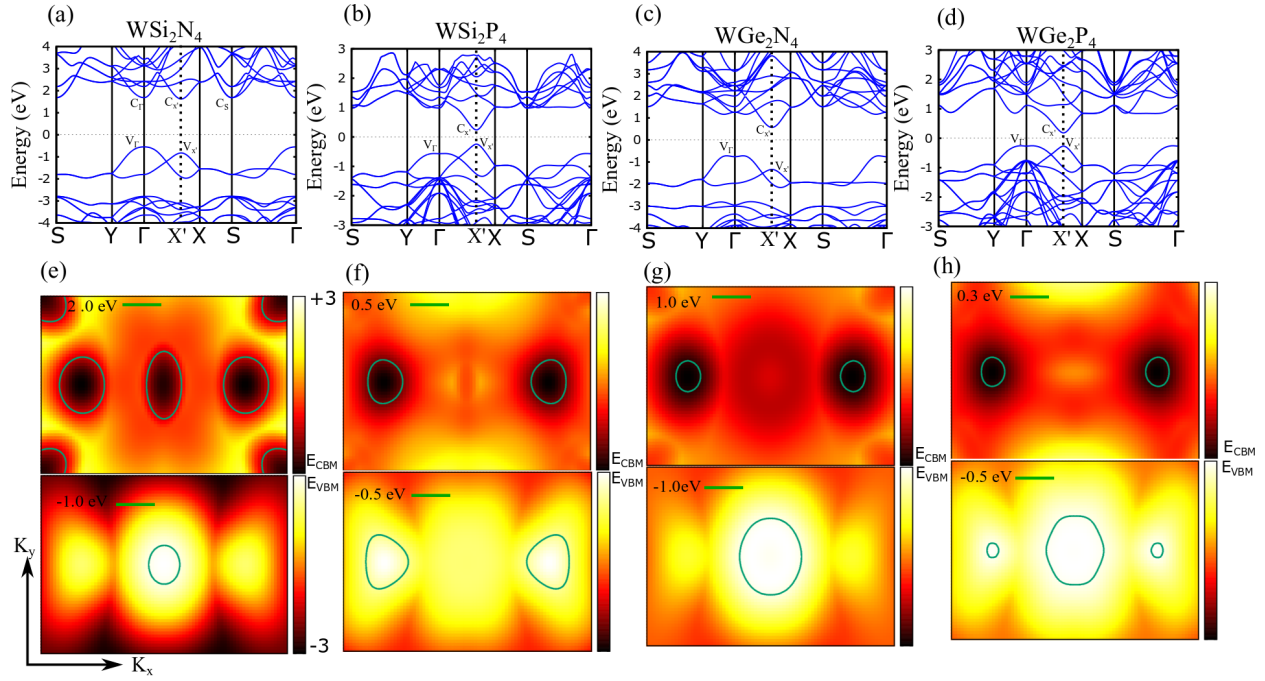

**FIG. S4:** The electronic band structures of (a) WSi<sub>2</sub>N<sub>4</sub>, (b) WSi<sub>2</sub>P<sub>4</sub>, (c) WGe<sub>2</sub>N<sub>4</sub> and (d) WGe<sub>2</sub>P<sub>4</sub> monolayers. (e)-(h) Corresponding 2D plots of the conduction (top panel) and valence band (bottom panel) energy over the entire Brillouin zone.

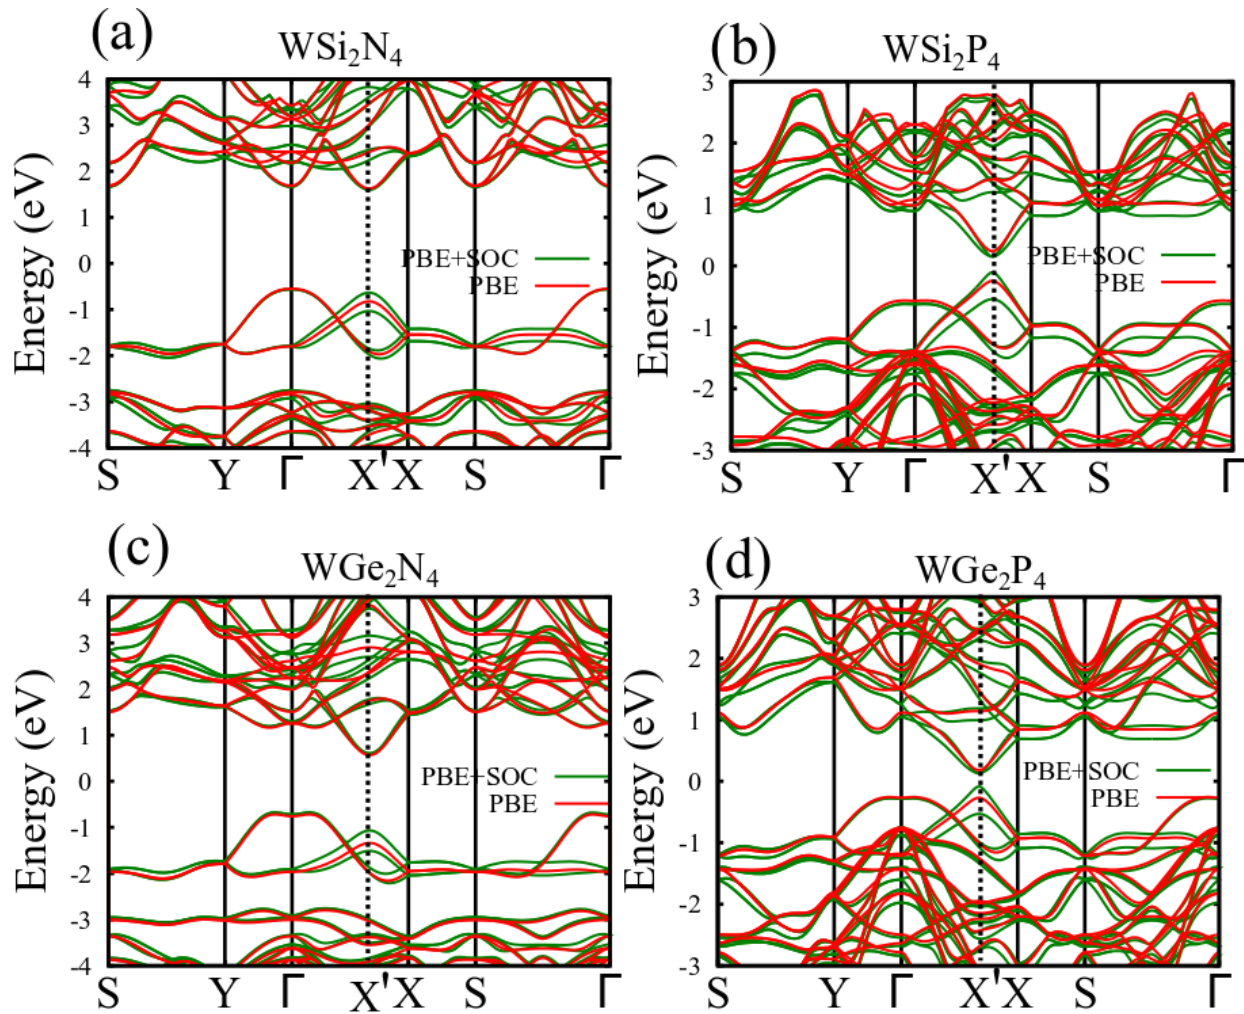

**FIG. S5:** PBE and PBE+SOC bandstructure of  $WA_2Z_4$  monolayers. The red and green lines represent PBE and PBE+SOC results, respectively.

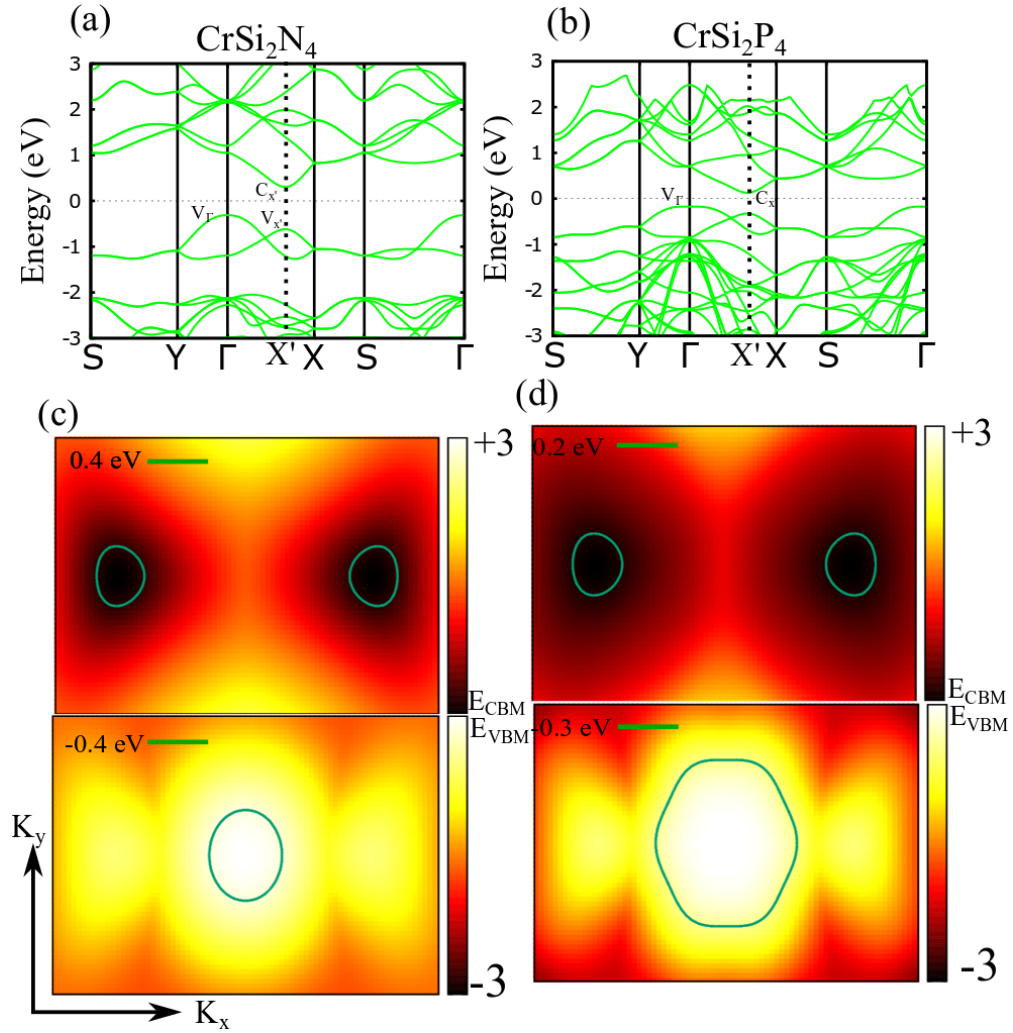

**FIG. S6:** (a)-(b) The electronic band structures of  $\text{CrSi}_2\text{N}_4$  and  $\text{CrSi}_2\text{P}_4$ , (c)-(d) Corresponding 2D plots of the conduction (top panel) and valence band (bottom panel) energy over the entire Brillouin zone.

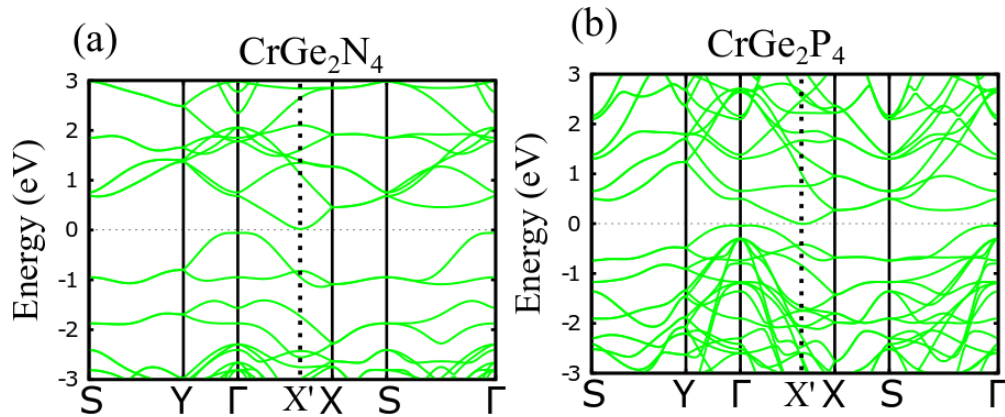

**FIG. S7:** The electronic band structures of (a)  $\text{CrGe}_2\text{N}_4$ , and (b)  $\text{CrGe}_2\text{P}_4$ .

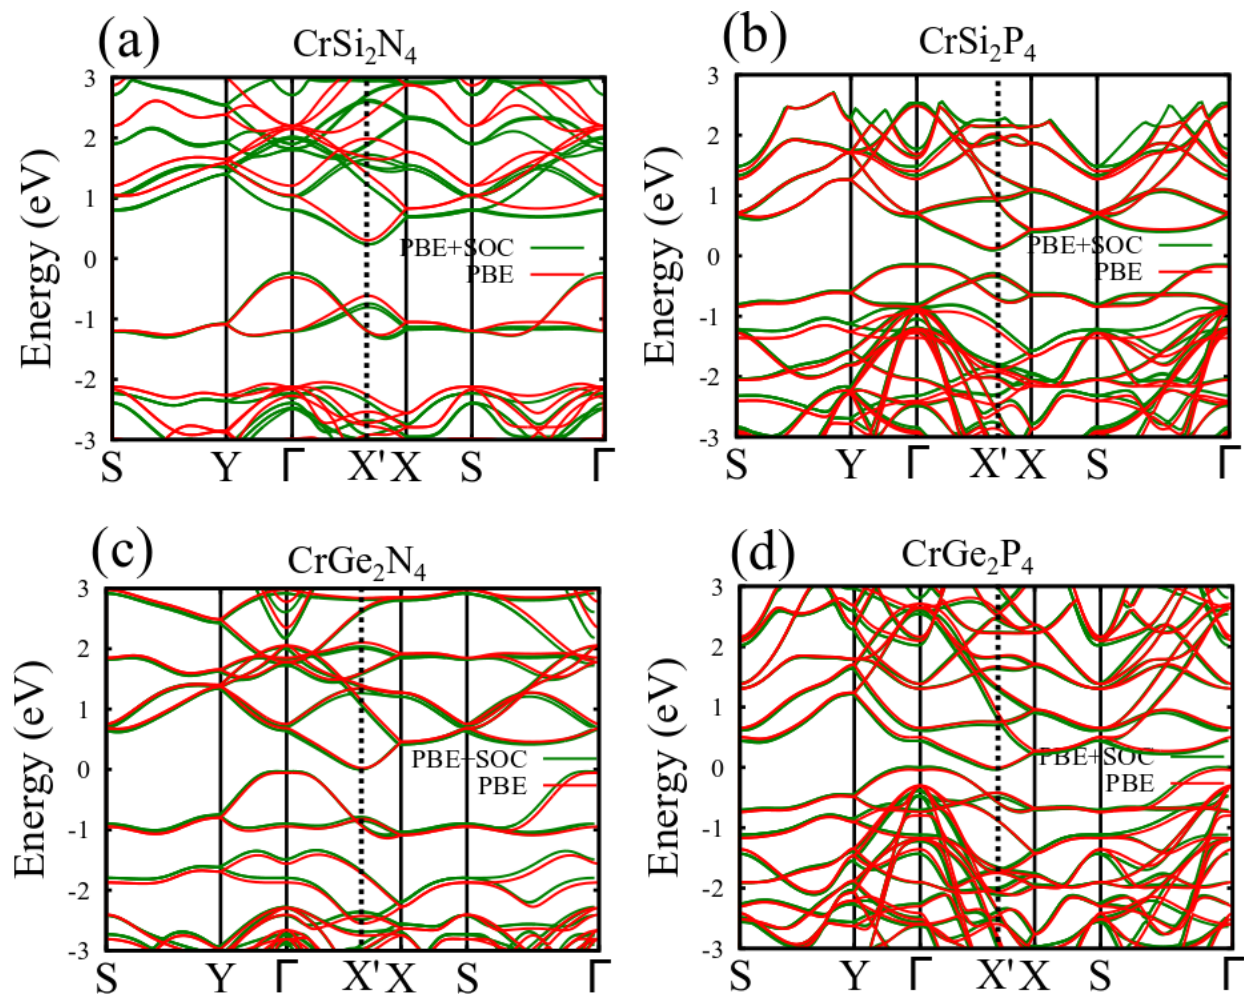

**FIG. S8:** PBE and PBE+SOC bandstructure of CrA<sub>2</sub>Z<sub>4</sub> monolayers. The red and green lines represent PBE and PBE+SOC results, respectively.

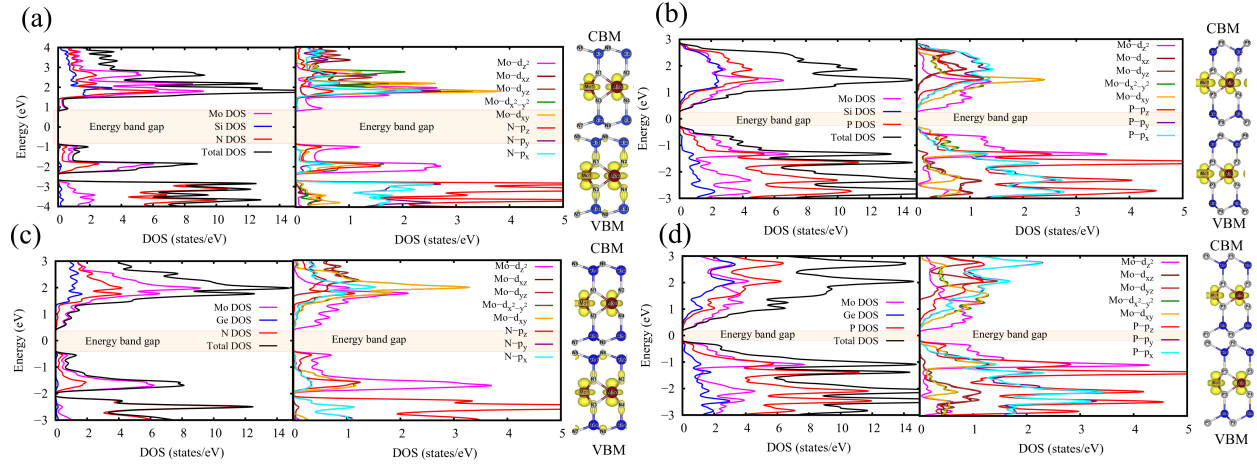

**FIG. S9:** The atom projected density of states of monolayer (a)  $\text{MoSi}_2\text{N}_4$ , (b)  $\text{MoSi}_2\text{P}_4$ , (c)  $\text{MoGe}_2\text{N}_4$  and (d)  $\text{MoGe}_2\text{P}_4$ . The right panel of the figures displays the corresponding wave functions at the valence band maximum (VBM) and at the conduction band minimum (CBM). Clearly, the Mo states dominate the DOS near the electronic bandgap. The isosurface value is set to be  $0.002 \text{ e}\text{\AA}^{-3}$ .

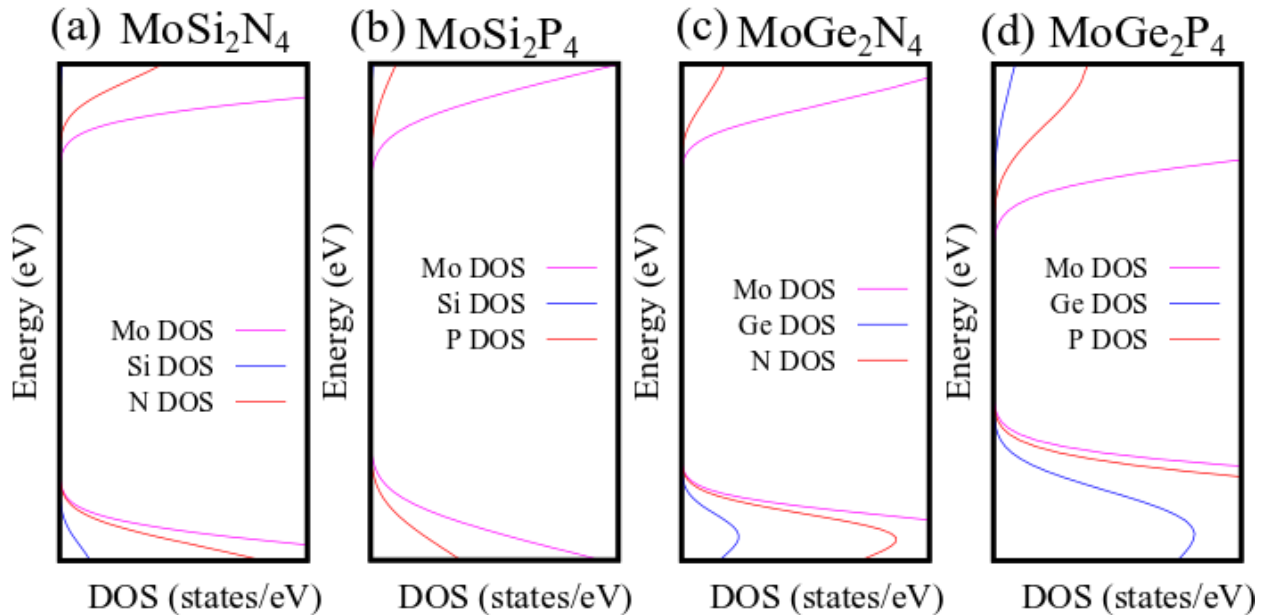

**FIG. S10:** A zoomed view of PDOS near VBM and CBM in  $\text{MoA}_2\text{Z}_4$  monolayers. In VBM, the contribution from P atoms is less than that of N atoms.

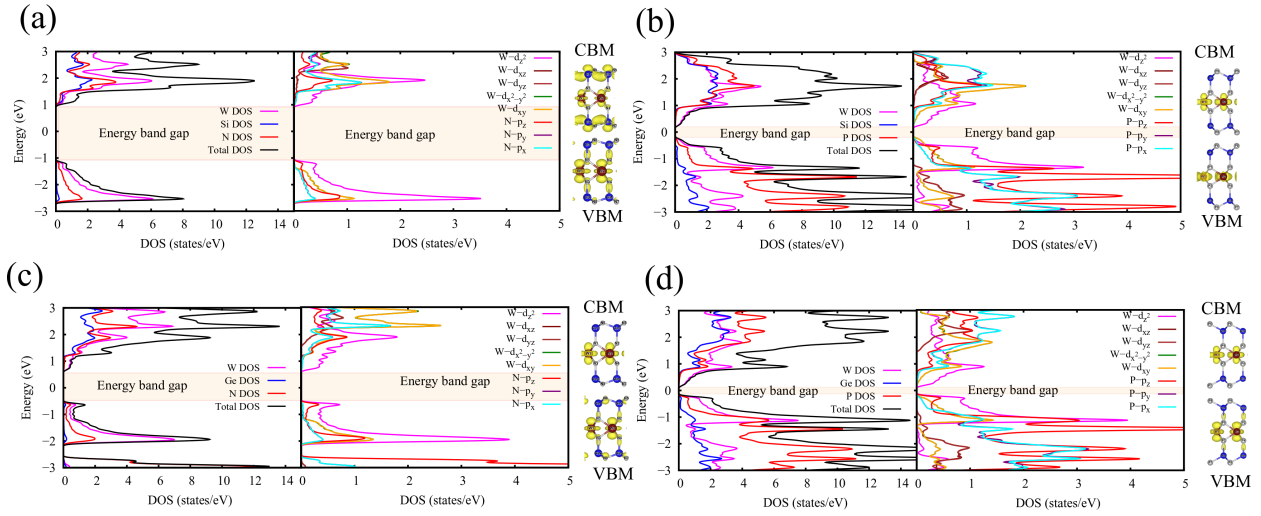

**FIG. S11:** The atom projected density of states of monolayer (a)  $\text{WSi}_2\text{N}_4$ , (b)  $\text{WSi}_2\text{P}_4$ , (c)  $\text{WGe}_2\text{N}_4$  and (d)  $\text{WGe}_2\text{P}_4$ . The right panel of the figures displays the corresponding wave functions at the valence band maximum (VBM) and at the conduction band minimum (CBM). Clearly, the W states dominate the DOS near the electronic bandgap. The isosurface value is set to be  $0.002 \text{ e}\text{\AA}^{-3}$ .

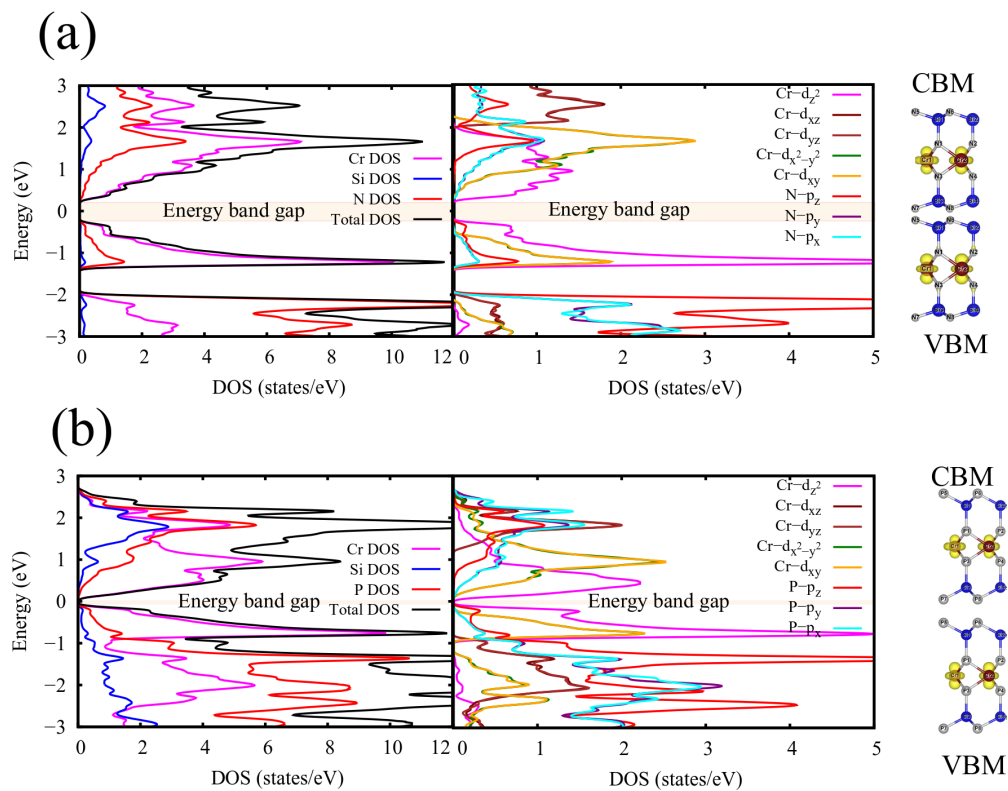

**FIG. S12:** The atom projected density of states of monolayer (a)  $\text{CrSi}_2\text{N}_4$  and (b)  $\text{CrSi}_2\text{P}_4$ . The right panel of the figures displays the corresponding wave functions at the valence band maximum (VBM) and at the conduction band minimum (CBM). Clearly, the Cr states dominate the DOS near the electronic bandgap. The isosurface value is set to be  $0.002 \text{ e}\text{\AA}^{-3}$ .

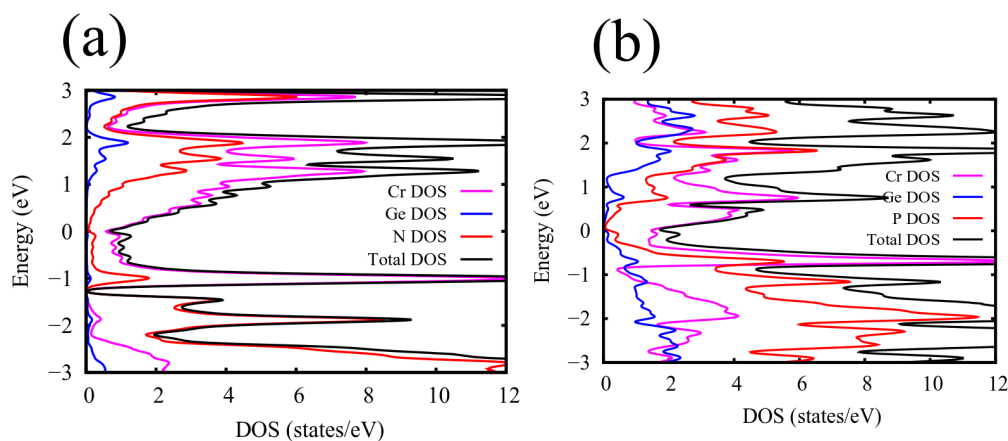

**FIG. S13:** PDOS of (a)  $\text{CrGe}_2\text{N}_4$  and (b)  $\text{CrGe}_2\text{P}_4$  monolayers.



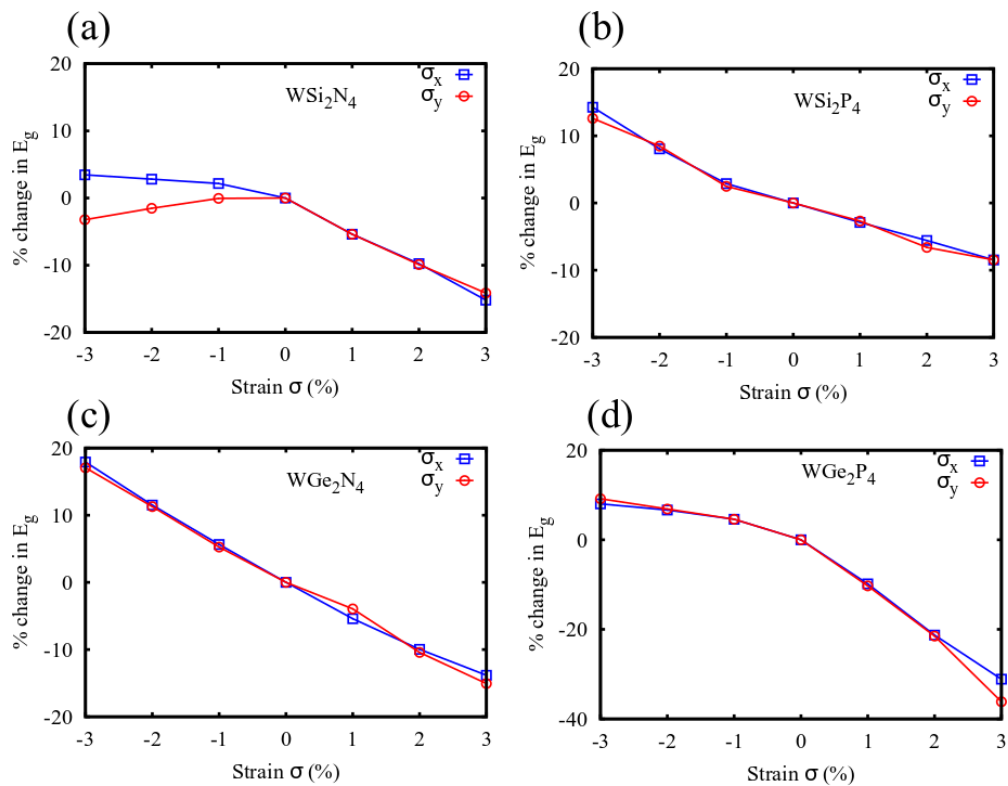

**FIG. S14:** (a)-(d) The % change in the electronic band gap of  $WA_2Z_4$  monolayer as a function of the uniaxial strain along the  $x$  and the  $y$  axes.

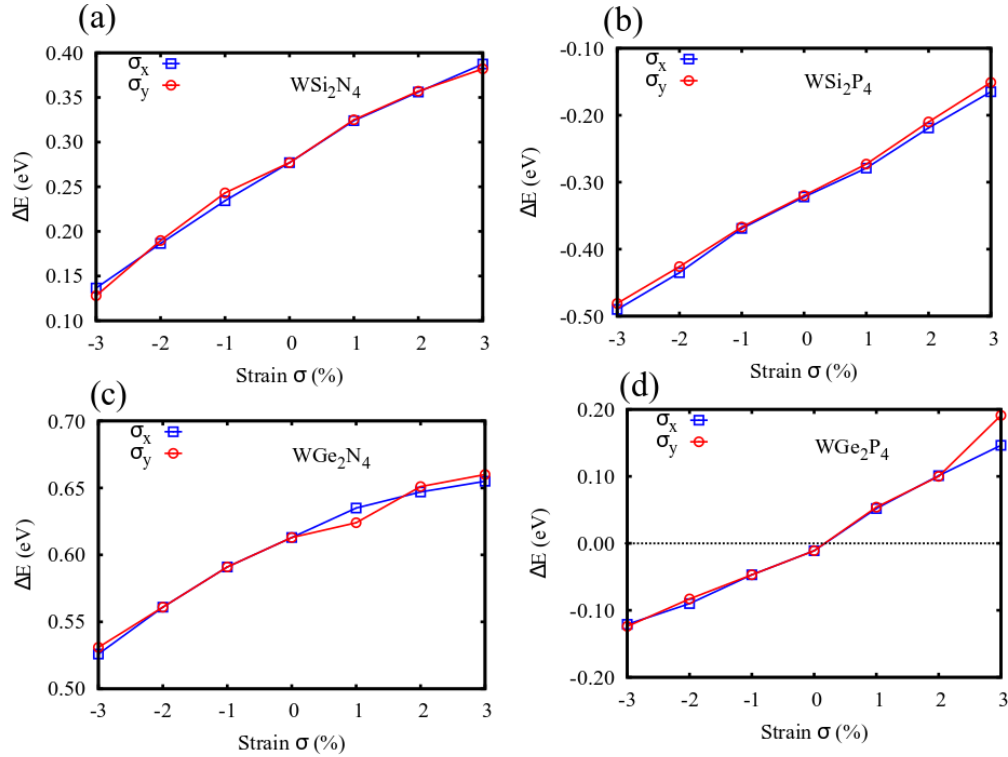

**FIG. S15:** (a)-(d) Change in the energy difference between the  $V_{\Gamma}$  and  $V_{X'}$  points in  $WA_2Z_4$  monolayer, defined as  $\Delta E = E_{VBM}(\Gamma) - E_{VBM}(X')$ .  $\Delta E > 0$  implies that the VBM is located at the  $\Gamma$  point, and it also marks the indirect bandgap semiconductor regime since the CBM remains fixed at the  $X'$  point for the specified strain range. Thus, *only*  $WGe_2P_4$  undergoes a direct to indirect bandgap transition, while the rest of the monolayers retain their zero strain characteristics.

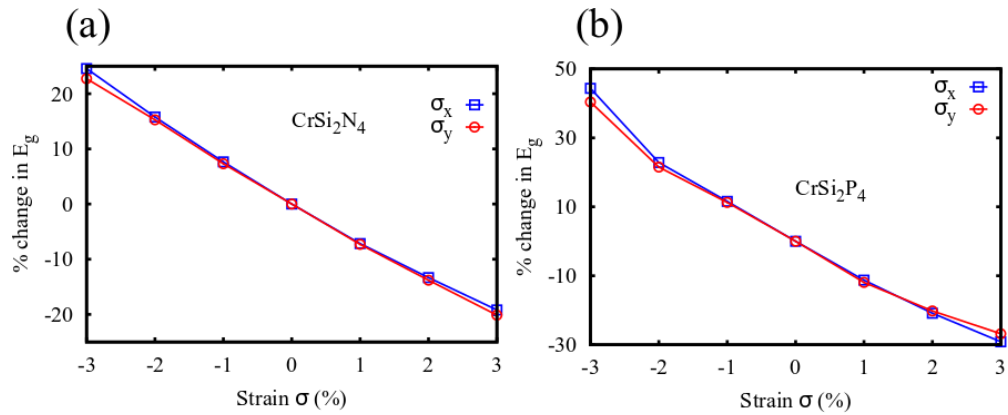

**FIG. S16:** The % change in the electronic band gap of (a)  $CrSi_2N_4$  and (b)  $CrSi_2P_4$  as a function of uniaxial strain along the  $x$  and  $y$  axes.

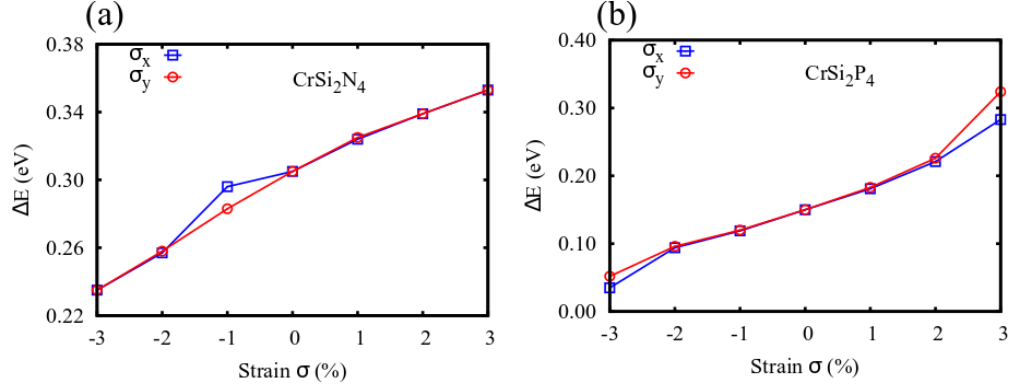

**FIG. S17:** Change in the energy difference between the  $V_{\Gamma}$  and  $V_{X'}$  points in  $\text{CrSi}_2\text{N}_4$  and  $\text{CrSi}_2\text{P}_4$  monolayers, defined as  $\Delta E = E_{V_{BM}}(\Gamma) - E_{V_{BM}}(X')$ .  $\Delta E > 0$  implies that the VBM is located at the  $\Gamma$  point, and it also marks the indirect bandgap semiconductor regime since the CBM remains fixed at the  $X'$  point for the specified strain range.

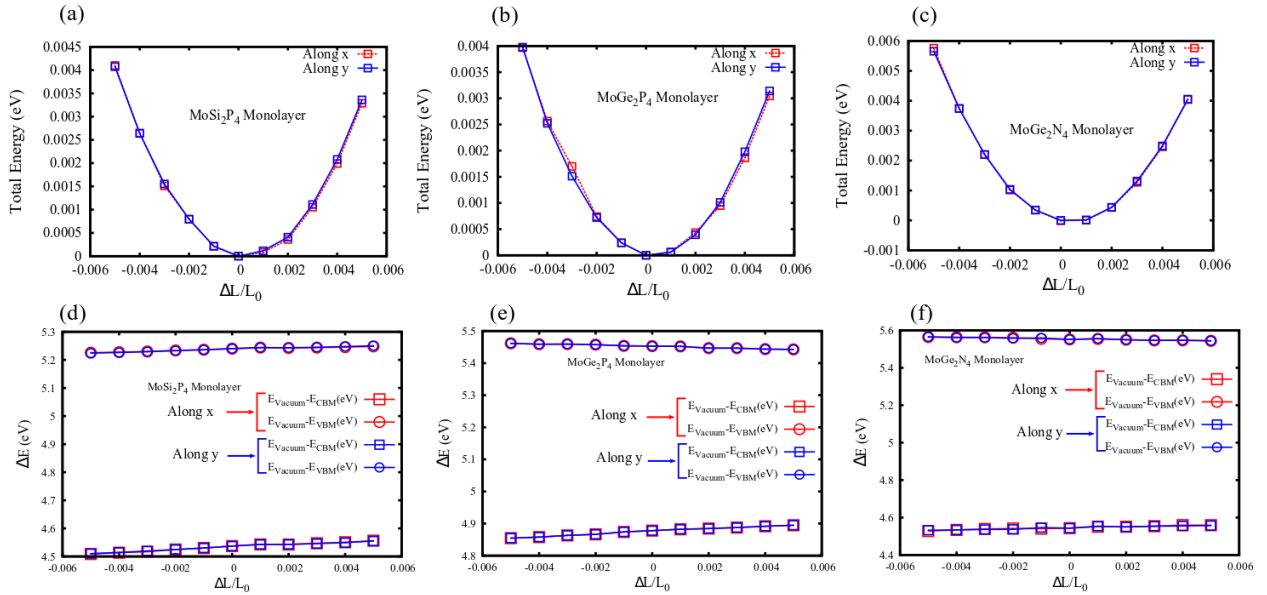

**FIG. S18:** (a)-(c) Energy-strain relationship along  $x$  and  $y$  directions in case of  $\text{MoA}_2\text{Z}_4$  monolayers, except  $\text{MoSi}_2\text{N}_4$ . (d)-(f) Corresponding conduction band shift and valence band shift under uniaxial strain along  $x$  and  $y$  directions. The elastic constant is determined by parabolic fitting, while the DP constant is determined by linear fitting.

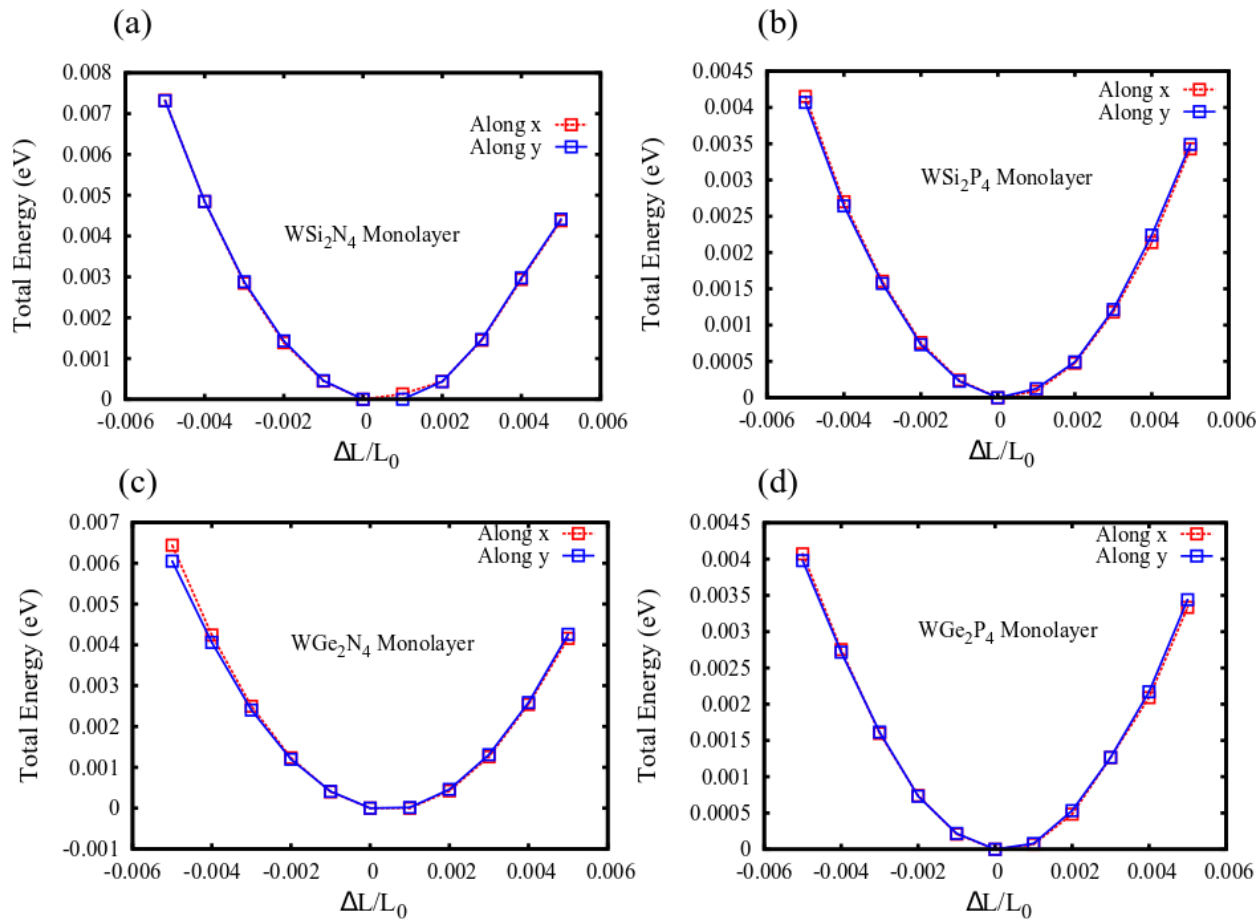

**FIG. S19:** Energy-strain relationship along  $x$  and  $y$  directions in case of  $WA_2Z_4$  monolayer.

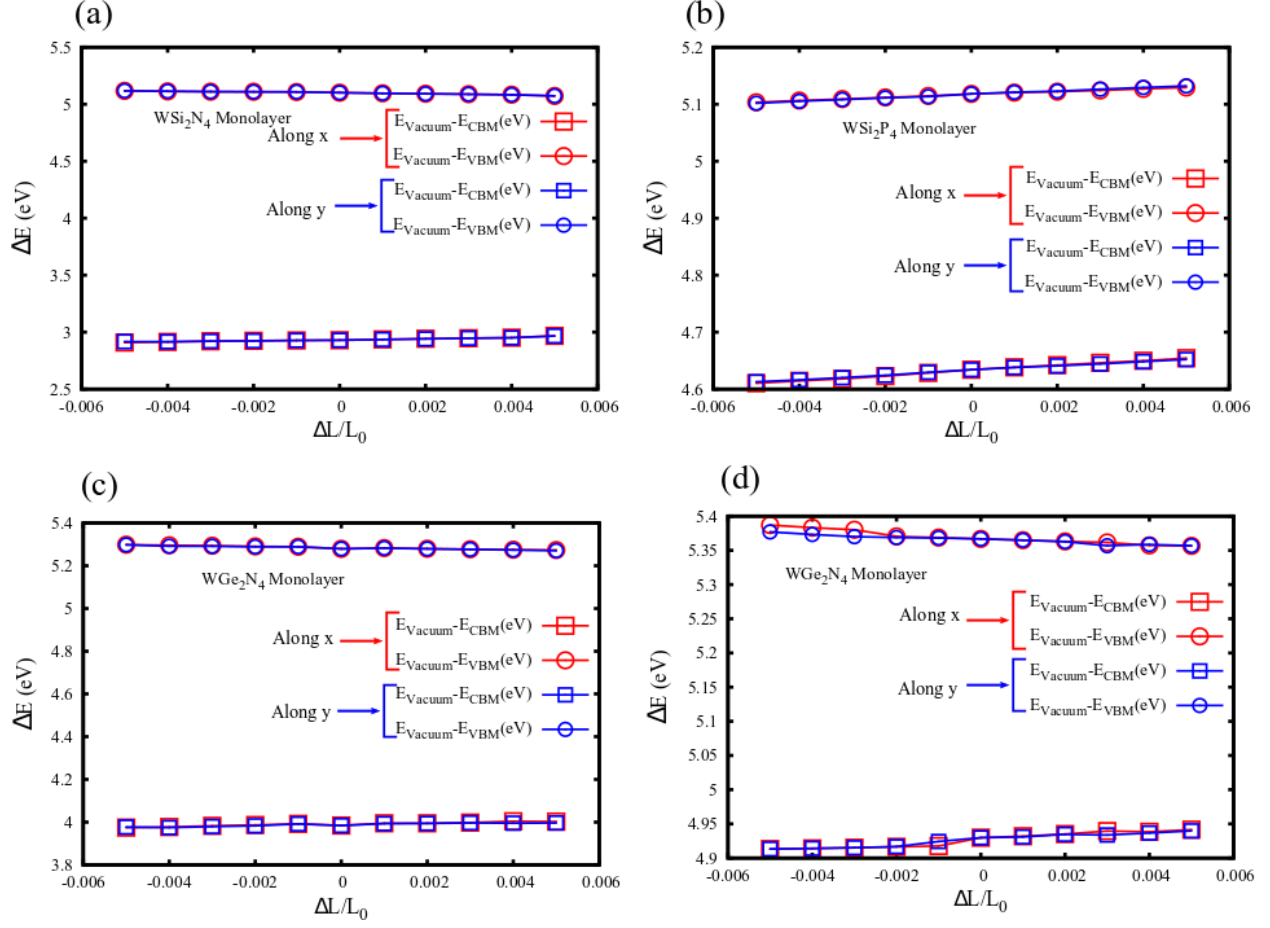

**FIG. S20:** Conduction band shift and valence band shift under uniaxial strain along  $x$  and  $y$  directions in case of  $\text{WA}_2\text{Z}_4$  monolayers.

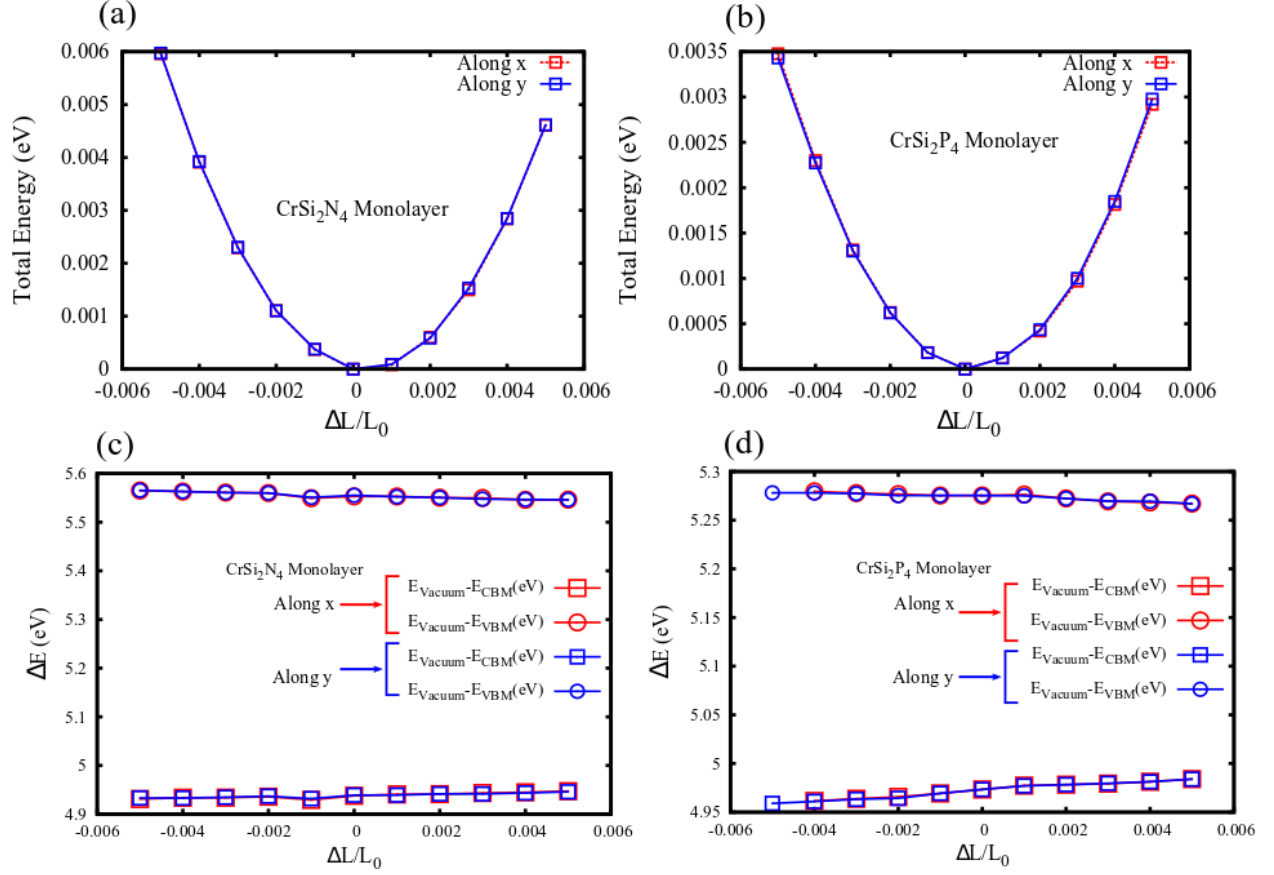

**FIG. S21:** (a)-(b) Energy-strain relationship along  $x$  and  $y$  directions. (c)-(d) Corresponding conduction band shift and valence band shift under uniaxial strain along  $x$  and  $y$  directions in case of CrSi<sub>2</sub>N<sub>4</sub> and CrSi<sub>2</sub>P<sub>4</sub> monolayers.

### III. MOBILITY CALCULATION

We have calculated mobility in MA<sub>2</sub>Z<sub>4</sub> monolayers along the  $\alpha$  ( $\alpha = x/y$ ) direction as described in refs. [8, 9] and is given by

$$\mu_{\alpha} = \frac{2e\hbar^3 C_{\alpha}}{3k_B T m_{\alpha}^* \sqrt{m_{\alpha}^* m_{\beta}^*} (E_{\alpha}^i)^2}. \quad (\text{S1})$$

$$\mu_{\alpha} = \frac{e\hbar^3 \left( \frac{5C_{\alpha} + 3C_{\beta}}{8} \right)}{k_B T m_{\alpha}^{1.5} m_{\beta}^{0.5} \left( \frac{9E_{\alpha}^2 + 7E_{\alpha}E_{\beta} + 4E_{\beta}^2}{20} \right)} \quad (\text{S2})$$

and corresponding results are presented in Table S3.

#### A. MOBILITY WITH SPIN-ORBIT COUPLING

To get more insight into the change in carriers' mobility due to spin-orbit coupling (SOC), we have calculated the effective mass of the charge carriers using the SOC band structure. We found that the change in the effective mass is ignorable in most cases. While in some monolayers, for example, WSi<sub>2</sub>P<sub>4</sub> and WGe<sub>2</sub>P<sub>4</sub>, the effective mass corresponding to the VBM and CBM are reduced by a factor of about 1.4 when compared to the PBE value. This decrease in effective mass increases the carrier's mobility by a factor of about 2 (see Table S2).

- 
- [1] N. Jena, A. Rawat, R. Ahammed, M. K. Mohanta, A. De Sarkar, *et al.*, Emergence of high piezoelectricity along with robust electron mobility in janus structures in semiconducting group ivb dichalcogenide monolayers, *Journal of Materials Chemistry A* **6**, 24885 (2018).
- [2] Y. K. Chung, J. Lee, W.-G. Lee, D. Sung, S. Chae, S. Oh, K. H. Choi, B. J. Kim, J.-Y. Choi, and J. Huh, Theoretical study of anisotropic carrier mobility for two-dimensional nb2se9 material, *ACS omega* **6**, 26782 (2021).
- [3] M. Zhou, X. Chen, M. Li, and A. Du, Widely tunable and anisotropic charge carrier mobility in monolayer tin (ii) selenide using biaxial strain: a first-principles study, *Journal of Materials Chemistry C* **5**, 1247 (2017).

- [4] T. Yu, Z. Zhao, Y. Sun, A. Bergara, J. Lin, S. Zhang, H. Xu, L. Zhang, G. Yang, and Y. Liu, Two-dimensional pc6 with direct band gap and anisotropic carrier mobility, *Journal of the American Chemical Society* **141**, 1599 (2019).
- [5] Y. Zhou, L. Zhou, and J. He, 2d nb3sbr7 and ta3sbr7: Experimentally achievable janus photocatalysts with robust coexistence of strong optical absorption, intrinsic charge separation, and ultrahigh solar-to-hydrogen efficiency, *ACS Applied Materials & Interfaces* **14**, 1643 (2021).
- [6] J. Zhao, X. Jin, H. Zeng, C. Yao, and G. Yan, Spin-valley coupling and valley splitting in the mosi2n4/crcl3 van der waals heterostructure, *Applied Physics Letters* **119**, 213101 (2021).
- [7] X. Cai, Z. Zhang, Y. Zhu, L. Lin, W. Yu, Q. Wang, X. Yang, X. Jia, and Y. Jia, A two-dimensional mose 2/mosi 2 n 4 van der waals heterostructure with high carrier mobility and diversified regulation of its electronic properties, *Journal of Materials Chemistry C* **9**, 10073 (2021).
- [8] J. Bardeen and W. Shockley, Deformation potentials and mobilities in non-polar crystals, *Physical review* **80**, 72 (1950).
- [9] H. Lang, S. Zhang, and Z. Liu, Mobility anisotropy of two-dimensional semiconductors, *Phys. Rev. B* **94**, 235306 (2016).
